# Supplementary material for: Establishment and Characterization of Multi-Drug Resistant p53-Negative Osteosarcoma SaOS-2 Subline
Source: MDPI journal article supplement (doi:10.3390/diagnostics13162646), 2023-08-11
Supplement: s1 [file s1]

## Figure legends

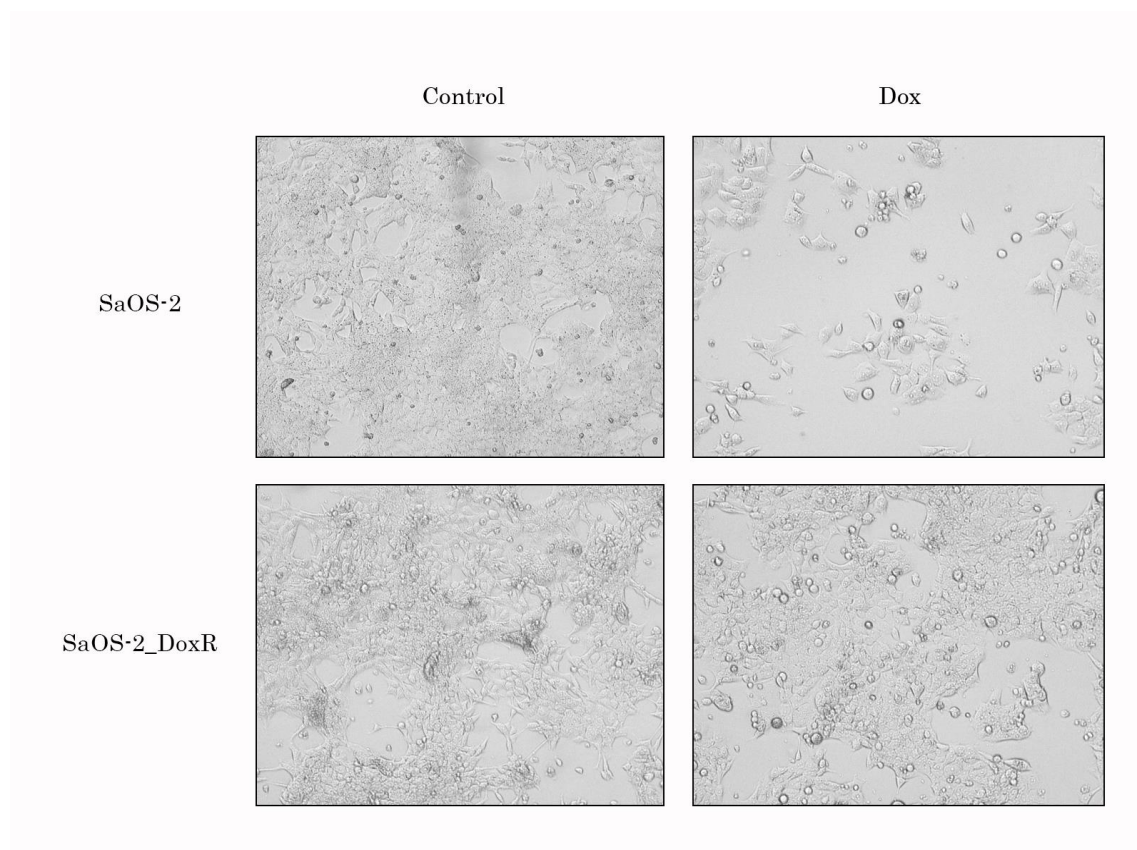

**Supplementary Figure S1.** Dox induces the changes in the confluency of SaOS-2 cells. SaOS-2 and SaOS-2\_DoxR cells were treated with solvent (DMSO) (control) and Dox (1  $\mu$ M) for 72 h and subjected to the light microscopy (Leica, 10 $\times$ ).

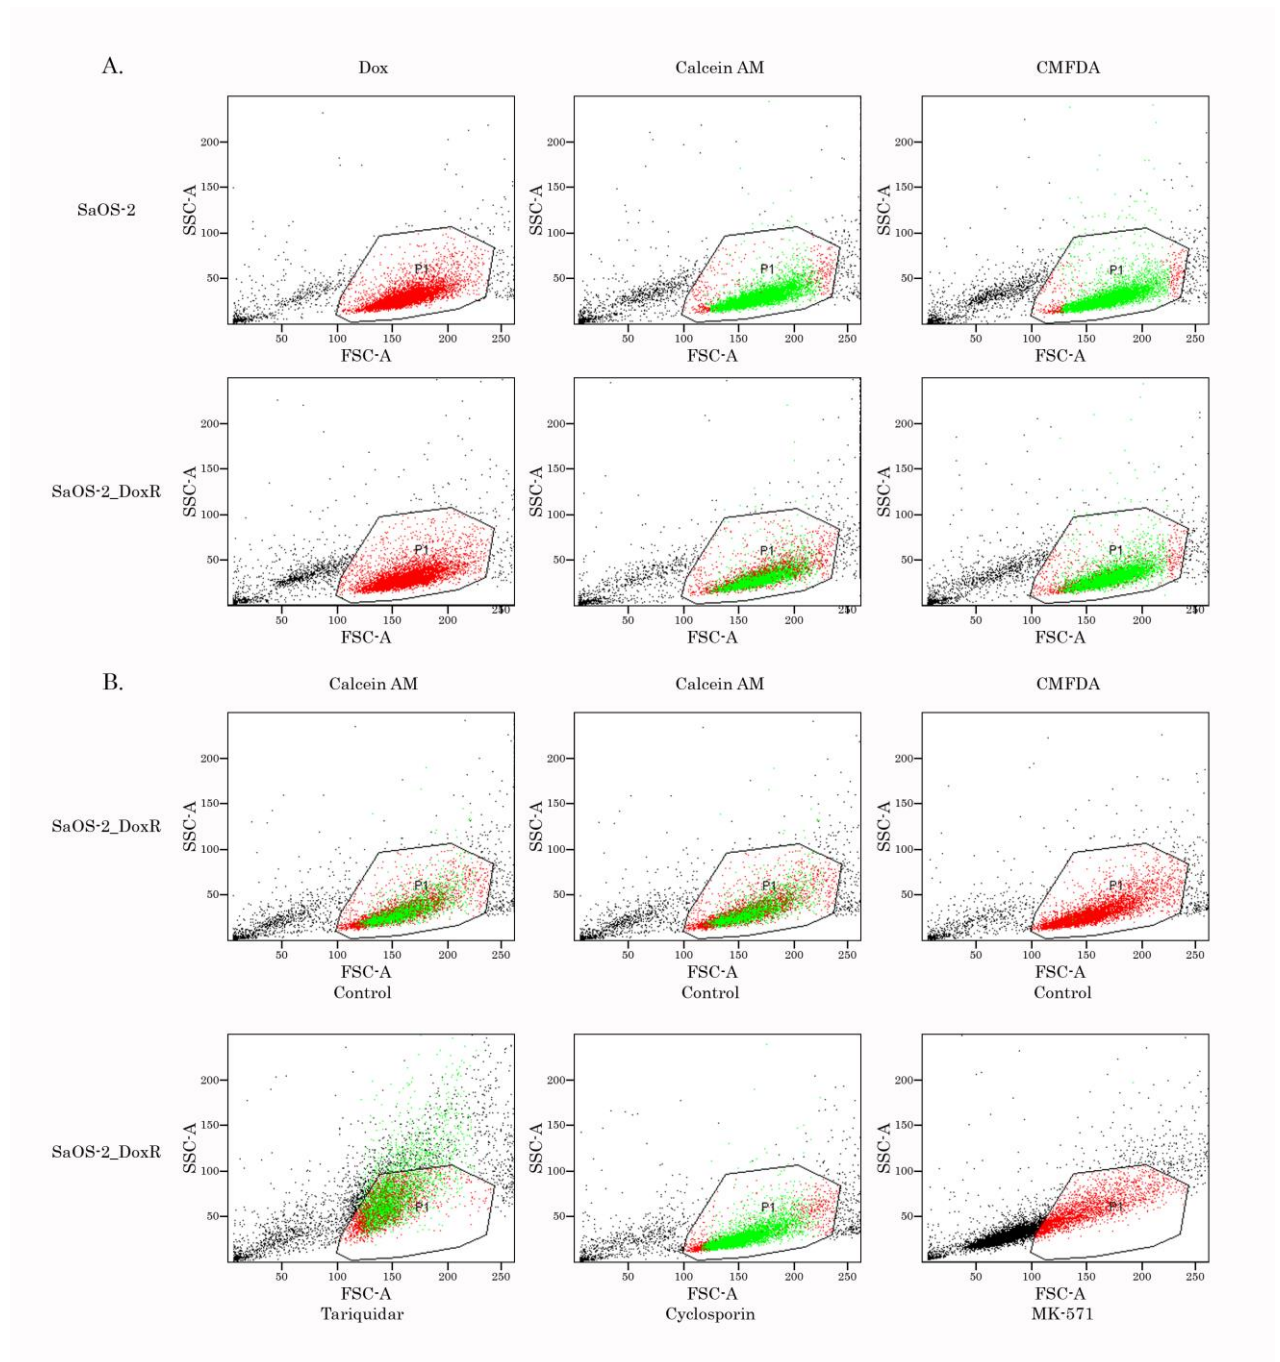

**Supplementary Figure S2.** FSC and SSC characteristics of Dox-resistant and naive (i.e., drug-sensitive) SaOS-2 cells that were shown in Figure 4 (A) or Figure 5 (B).

**Supplementary Table S1. Primers for quantitative polymerase chain reaction**

| Gene  | Forward                 | Reverse                   |
|-------|-------------------------|---------------------------|
| GAPDH | GACCACAGTCCATGCCATCA    | TCCACCACCCTGTTGCTGTA      |
| MDR-1 | ATGCTCTGGCCTTCTGGATGGGA | ATGGCGATCCTCTGCTTCTGCCCAC |
| MRP-1 | GCATGA TCCCTGAAGACGA    | TAGAGCTGGCCCTTGTACTC      |
| MRP-2 | TAGAGCTGGCCCTTGTACTC    | TCAACTTCCCAGACATCCTC      |
| MRP-3 | CGCCTGTTTTTCTGGTGGTT    | TCCCCCAGTCACAAAGATG       |
| MRP-4 | GCTGAGAATGACGCACAGAA    | TCCCAGCAAGGCACGATATT      |
| MRP-5 | GTCCTGGGTATAGAAGTGTG    | CAGAAGATCCACACAACCCT      |
| MRP-6 | TTGGATTGCCCCTCATAGTC    | TCTTTTGGTCTCAGTGGCCT      |
| MRP-7 | CTCCCACTGGATCTCTCAGC    | TCGCATACACGGTGAGGTAG      |
| ABCG2 | TTTCCAAGCGTTCATTCAAAA A | TACGACTGTGACAATGATCTGAGC  |
